# Supplementary material
Source: publisher figshare collection journal article supplement (https://karger.figshare.com/ndownloader/files/13638182)
Supplement: Supplementary file 1 [file 13638182]

**A**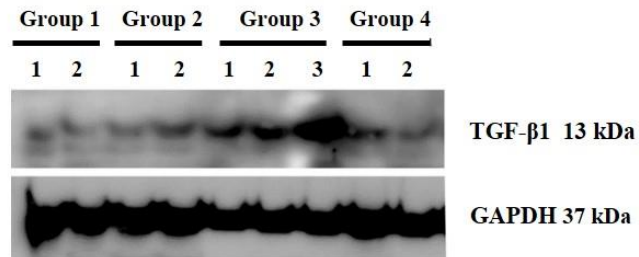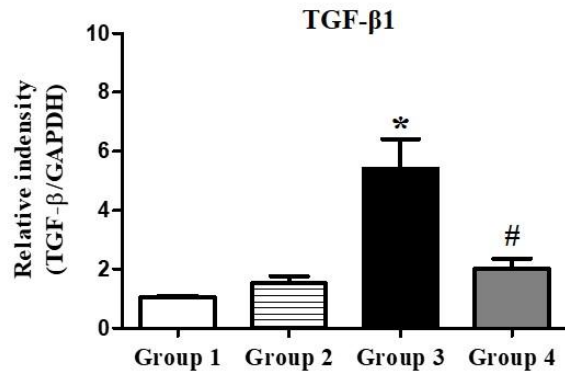**B**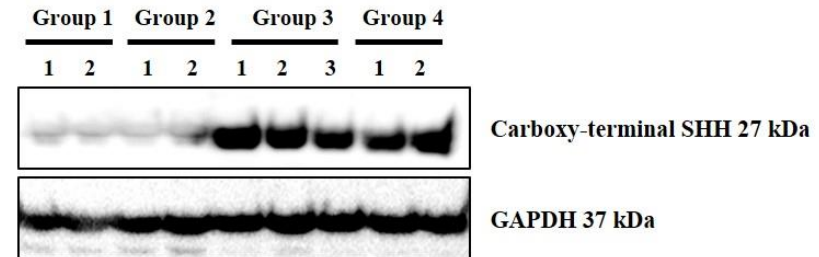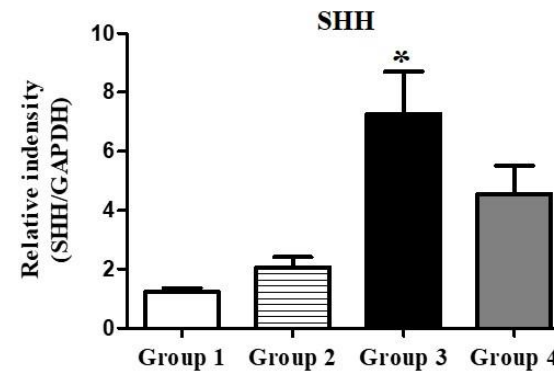

**Supplementary figure 1. Itraconazole treatment inhibits the expression of TGF-β1 and SHH in peritoneal tissues.** Expressions of TGF-β1 and SHH were examined by western blot. Quantification is shown in the lower panel. Group 1, saline group; Group 2, saline + itraconazole group; Group 3, CG group; Group 4, CG + itraconazole group. The results are expressed as mean ± SEM. \* <0.001 versus group 1, # <0.001 versus group 3.

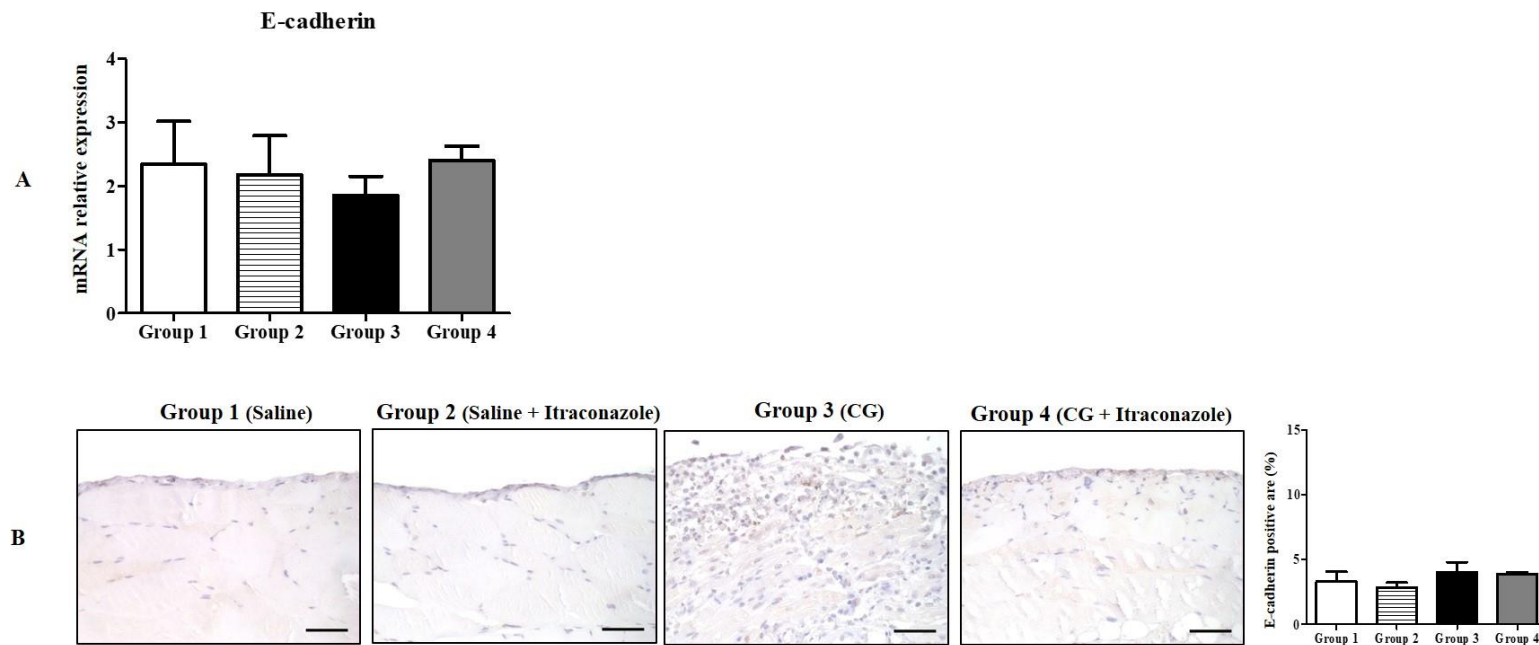

**Supplementary figure 2. E-cadherin expressions in peritoneal tissues.** The mRNA expression of E-cadherin was analyzed by real-time polymerase chain reaction (A). The expression of E-cadherin in the peritoneum was observed using immunohistochemical analysis (B). Scale bar 50 $\mu$ m. Original magnification  $\times$  400. Group 1, saline group; Group 2, saline + itraconazole group; Group 3, CG group; Group 4, CG + itraconazole group. The results are expressed as mean  $\pm$  SEM.
